# Supplementary material for: Cluster-derived TiO2 nanocrystals with multiple carbon coupling for interfacial pseudo-capacitive lithium storage
Source: Royal Society of Chemistry journal article supplement (doi:10.1039/d2dt02823a), 2022-01-01
Supplement: d2dt02823a1.pdf [file d2dt02823a1.pdf]

## Electronic Supplementary Information

### Cluster-derived TiO<sub>2</sub> nanocrystals with multiple carbon coupling for interfacial pseudo-capacitive lithium storage

Xi Bi,<sup>a, c, +</sup> Zhanli Chai,<sup>c, +</sup> Yongjian Niu,<sup>a</sup> Yangyang Feng,<sup>b</sup> Linlin Zhang,<sup>a, b, \*</sup> and Cheng Wang<sup>a</sup>

<sup>a</sup> Tianjin Key Laboratory of Advanced Functional Porous Materials and Center for Electron Microscopy, Institute for New Energy Materials & Low-Carbon Technologies, School of Materials Science and Engineering, Tianjin University of Technology, Tianjin 300384, China

<sup>b</sup> CAS Key Laboratory of Design and Assembly of Functional Nanostructures, Fujian Key Laboratory of Nanomaterials, Fujian Institute of Research on the Structure of Matter, Chinese Academy of Sciences, Fuzhou 350002, China

<sup>c</sup> Inner Mongolia Key Laboratory of Chemistry and Physics of Rare Earth Materials, School of Chemistry and Chemical Engineering, Inner Mongolia University, Hohhot 010021, China

<sup>+</sup> These authors contributed equally to this work.

\* Corresponding author: Linlin Zhang; Email: [zhanglinlin\\_cn@126.com](mailto:zhanglinlin_cn@126.com)

## Table of Content

**Figure S1** XRD patterns of the as-synthesized Ti8Ph cluster and the simulated ones.

**Figure S2** XRD patterns and Raman spectra of the three typical samples of TiO<sub>2</sub> nanocrystals.

**Figure S3** TEM, HRTEM images and SAED patterns of the control samples of TiO<sub>2</sub> nanocrystals.

**Figure S4** SEM images of products obtained with 10 ml H<sub>2</sub>O and different amounts of NaF.

**Figure S5** SEM images of products obtained with different dosages of DMF, H<sub>2</sub>O and NaF.

**Figure S6** SEM and TEM images of pristine TiO<sub>2</sub> nanocrystals with the middle size.

**Figure S7** SEM and TEM images of TiO<sub>2</sub>-rGO, in which TiO<sub>2</sub> nanocrystals were of the middle size.

**Figure S8** Ti 2p, O 1s and C 1s XPS of the samples of TiO<sub>2</sub>, TiO<sub>2</sub>-C, TiO<sub>2</sub>-rGO, and TiO<sub>2</sub>-C-GO.

**Figure S9** TEM images, XRD patterns and Nyquist plots of the active materials corresponding to TiO<sub>2</sub>-C-rGO after cycling for more than 300 cycles at the current rate of 0.1 A g<sup>-1</sup>.

**Figure S10** TEM images, XRD patterns, N<sub>2</sub> adsorption-desorption isotherms, Raman spectra, and TG curves of s-TiO<sub>2</sub>-C-rGO, TiO<sub>2</sub>-C-rGO and l-TiO<sub>2</sub>-C-rGO.

**Figure S11** SEM images and Nyquist plots of s-TiO<sub>2</sub>-C-rGO, TiO<sub>2</sub>-C-rGO and l-TiO<sub>2</sub>-C-rGO after cycling for more than 300 cycles at the current rate of 0.1 A g<sup>-1</sup>.

**Table S1** Comparisons of lithium storage performances with reported TiO<sub>2</sub>-based nanostructures.

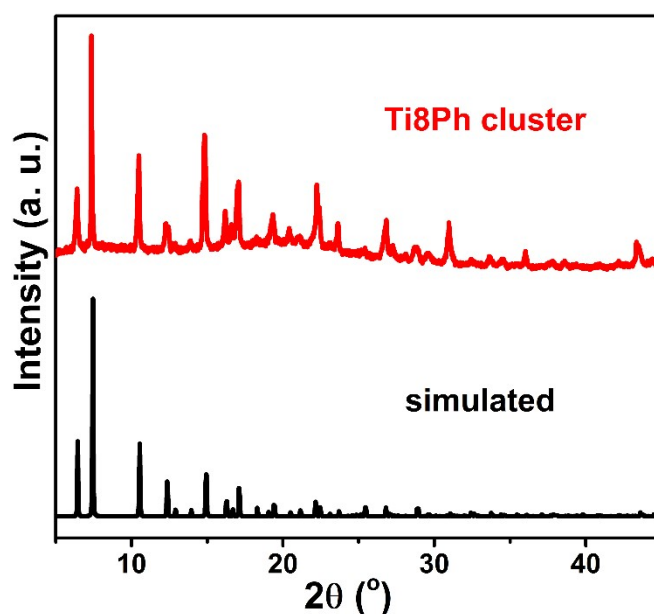

**Figure S1** XRD patterns of the as-synthesized Ti8Ph cluster and the simulated ones.

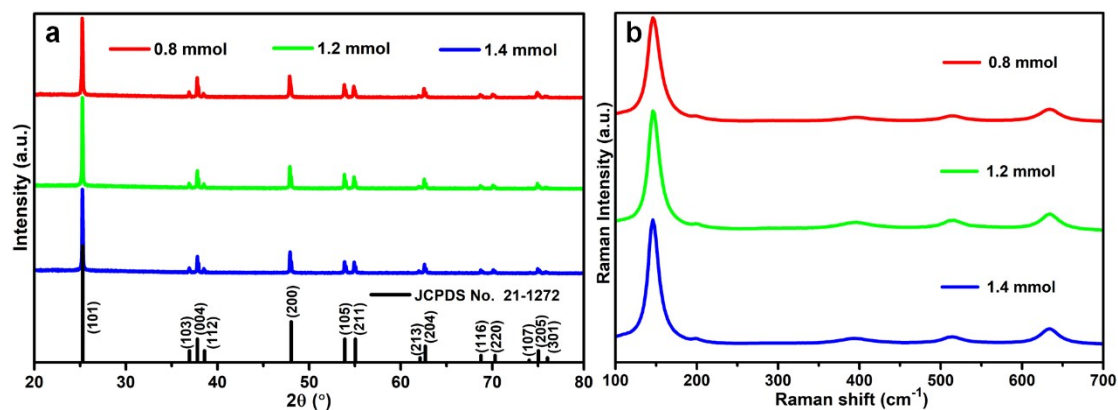

**Figure S2** XRD patterns (a) and Raman spectra (b) of the three typical samples obtained with 2 ml of DMF and 8 ml of H<sub>2</sub>O using 0.8 mmol, 1.2 mmol and 1.4 mmol of NaF using Ti<sub>8</sub>Ph as the precursor.

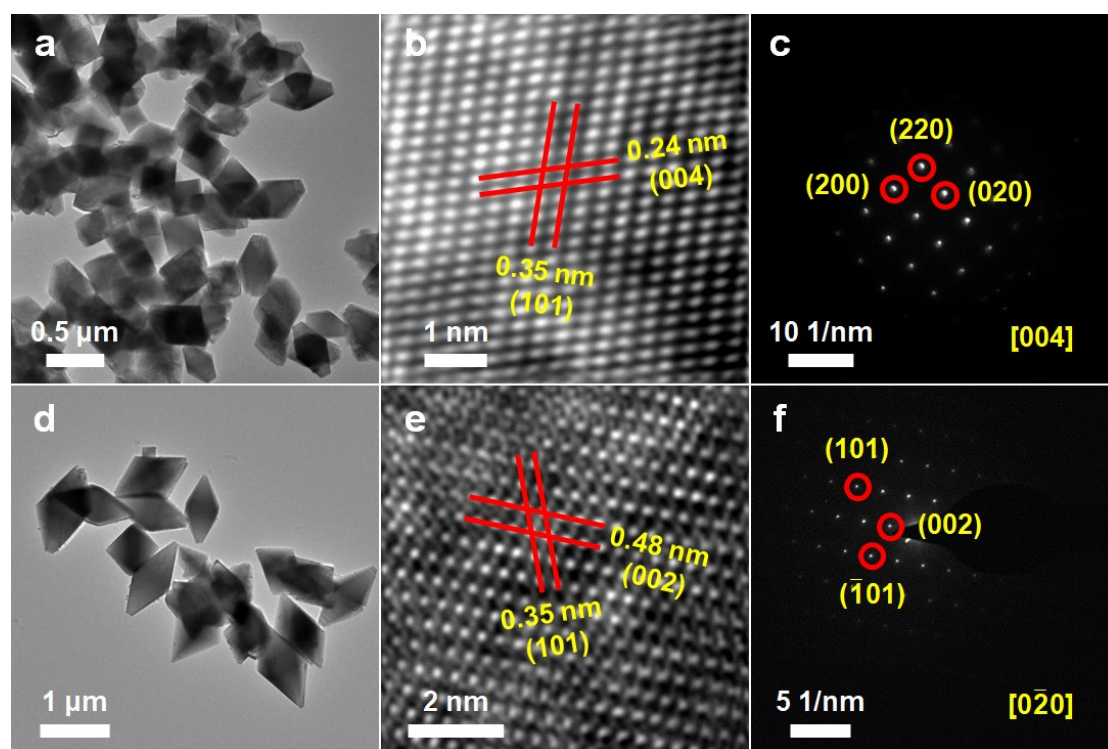

**Figure S3** TEM (a,d), HRTEM (b, e) images and SAED patterns (c, f) of the samples obtained with 2 ml of DMF and 8 ml of H<sub>2</sub>O using 0.8 mmol (a-c) and 1.4 mmol (d-f) of NaF using Ti<sub>8</sub>Ph as the precursor.

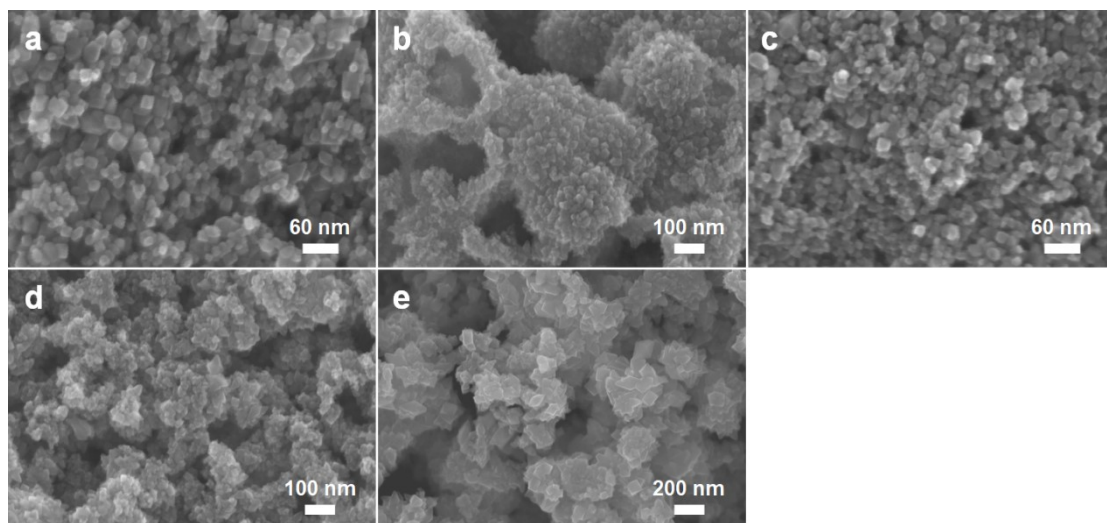

**Figure S4** SEM images of products obtained with 10 ml H<sub>2</sub>O and different amounts of NaF. (a) 0.4 mmol, (b) 0.8 mmol, (c) 1.2 mmol, (d) 1.6 mmol, (e) 2.0 mmol.

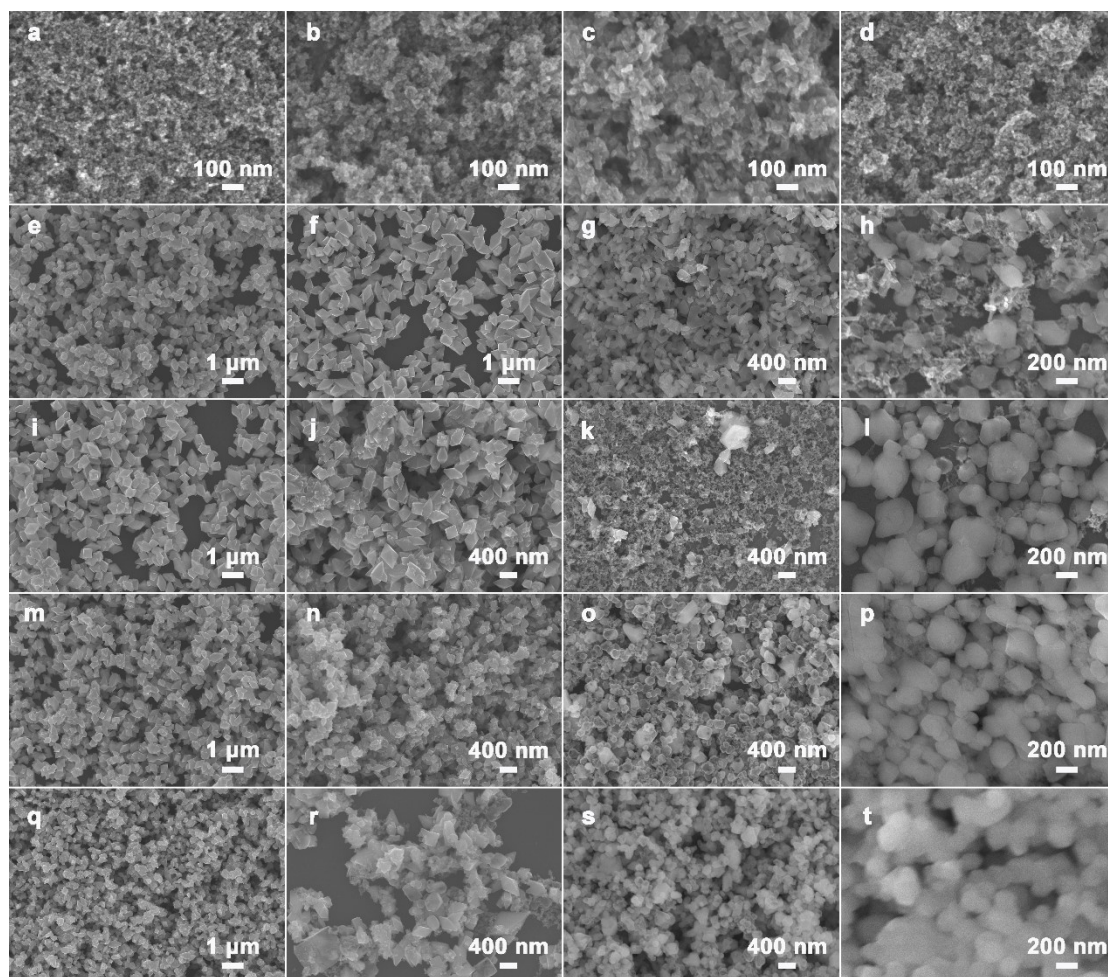

**Figure S5** SEM images of products obtained with  $x$  ml of DMF,  $y$  ml of  $H_2O$  and  $z$  mmol of NaF. (a, e, I, m, q)  $x=2$ ,  $y=8$ , (b, f, j, n, r)  $x=4$ ,  $y=6$ , (c, g, k, o, s)  $x=6$ ,  $y=4$ , (d, h, l, p, t)  $x=8$ ,  $y=2$ ; (a-d)  $z=0.4$ , (e-h)  $z=0.8$ , (i-l)  $z=1.2$ , (m-p)  $z=1.6$ , (q-t)  $z=2.0$ .

To scrutinize the influences of H<sub>2</sub>O, DMF and NaF on the products, a series of control experiments were conducted. With exclusive DMF, only sol-like species could be obtained. With H<sub>2</sub>O as the sole solvent, only small irregular nanoparticles could be observed (**Figure S4**). With mixed solvent of DMF and H<sub>2</sub>O, well-defined truncated tetragonal bipyramids gradually showed up and grew bigger and sharper with increasing dosage of NaF (**Figure S5**). As the ratio of H<sub>2</sub>O increased, less NaF was needed to convert Ti<sub>8</sub>Ph into faceted TiO<sub>2</sub> nanocrystals. However, in the presence of insufficient and excessive NaF, small irregular nanoparticles and aggregated species other than TiO<sub>2</sub> were produced, respectively, regardless of the solvent composition. Hence, appropriate amount of DMF, H<sub>2</sub>O and NaF was essential to form uniform and well-faceted TiO<sub>2</sub> nanocrystals. Since DMF could well dissolve Ti<sub>8</sub>Ph, the cluster probably existed in the form of molecules in the reaction solution. It could serve either as building blocks to directly participate in the construction of nanocrystals, or as reservoirs that were able to continuously and steadily release Ti ions during the reaction. Such bottom-up synthetic processes may be accounted for the homogeneous nucleation and the resulting uniform generation of TiO<sub>2</sub>. H<sub>2</sub>O, another solvent, acted as both the source and medium for the subsequent hydrolysis and condensation of the Ti-O cluster. As is well-established, fluoride ions and HF are effective in promoting the exposure of (001) facets of anatase TiO<sub>2</sub> by tightly adsorbing on the (001) facets. Herein, NaF also played vital roles in facilitating the oriented growth of faceted TiO<sub>2</sub> nanocrystals. Yet to our surprise, the percentage of (001) facets gradually decreased with the increase of the amount of NaF. This unusual phenomenon might be rationalized by the large electronegativity of fluorine, which enabled fluoride ions to form hydrogen bonds with both H<sub>2</sub>O and the aldehyde group of DMF. Besides, because of the electrostatic interaction, sodium ions would be attracted to the carboxylic acids surrounding the core of Ti<sub>8</sub>Ph, and meanwhile the majority of fluoride ions would stay close to the sodium ions. As a result, the number of fluoride ions capable of adsorbing on the surfaces of TiO<sub>2</sub>, particularly (001) facets, would be greatly declined, leading to less inhibited growth of the nanocrystals and gradual elimination of (001) facets. Therefore, it was reasonable to conclude that NaF was of paramount importance to the shape and size control of the TiO<sub>2</sub> nanocrystals. Its cooperative work with the precursor and solvents was also responsible for the oriented growth of the well-defined truncated tetragonal bipyramids of anatase TiO<sub>2</sub>.

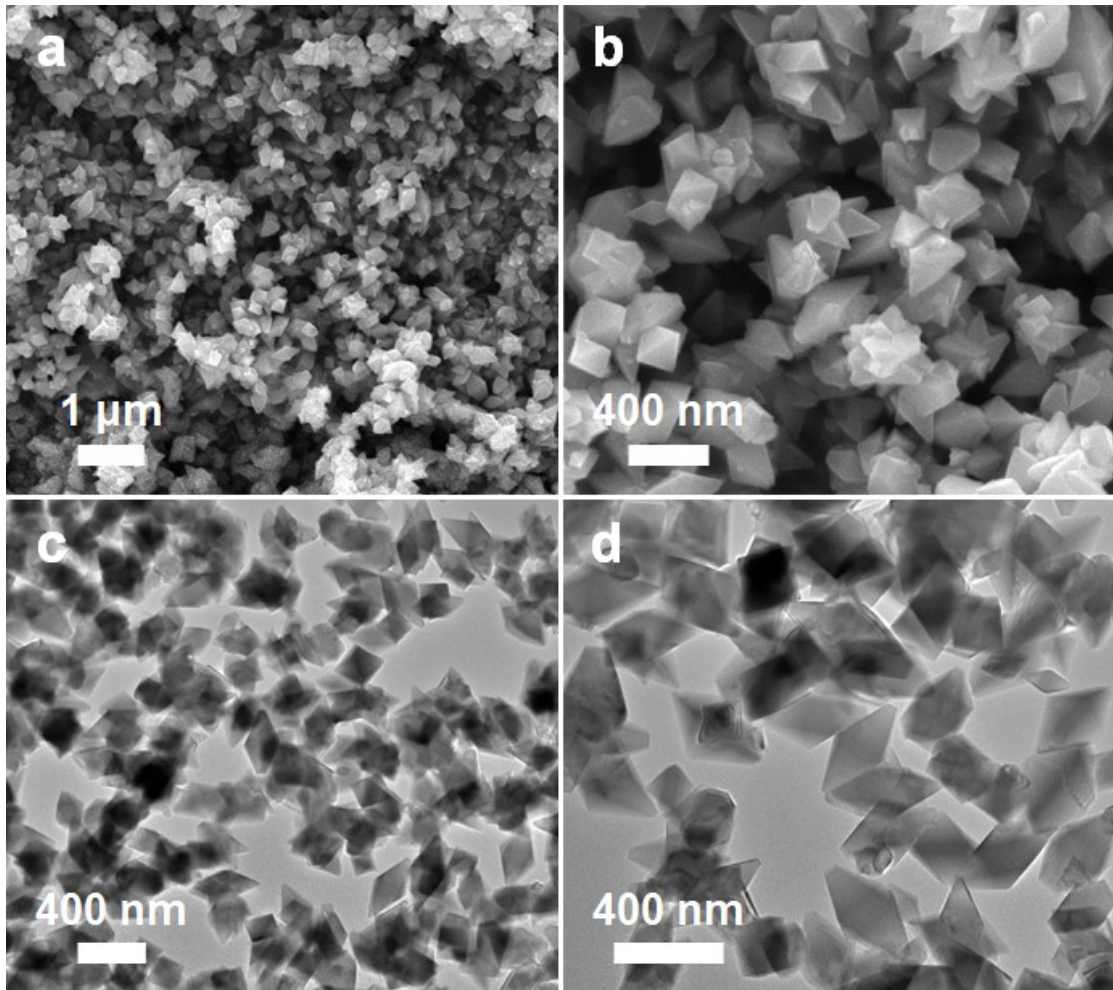

**Figure S6** SEM and TEM images of pristine TiO<sub>2</sub> nanocrystals with the middle size.

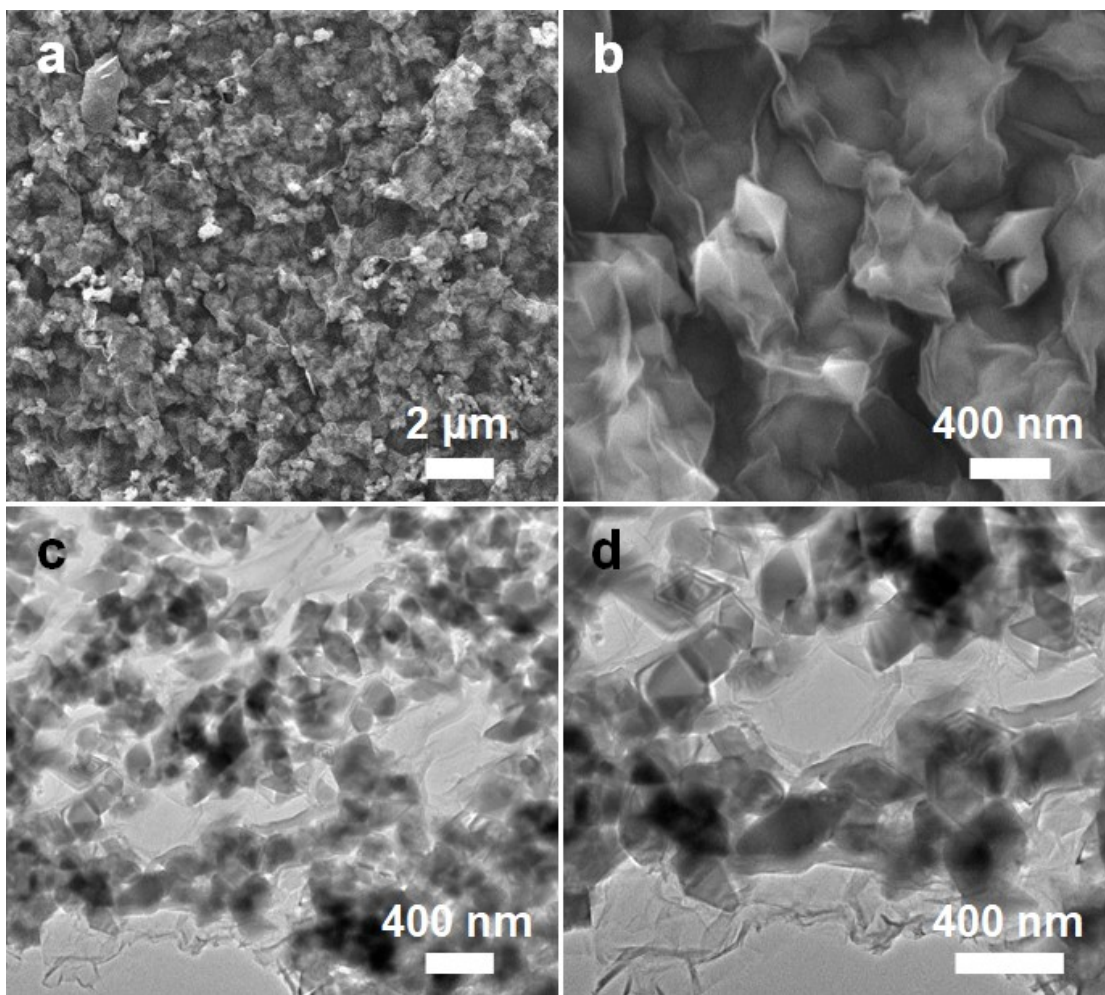

**Figure S7** SEM and TEM images of TiO<sub>2</sub>-rGO, in which TiO<sub>2</sub> nanocrystals were of the middle size.



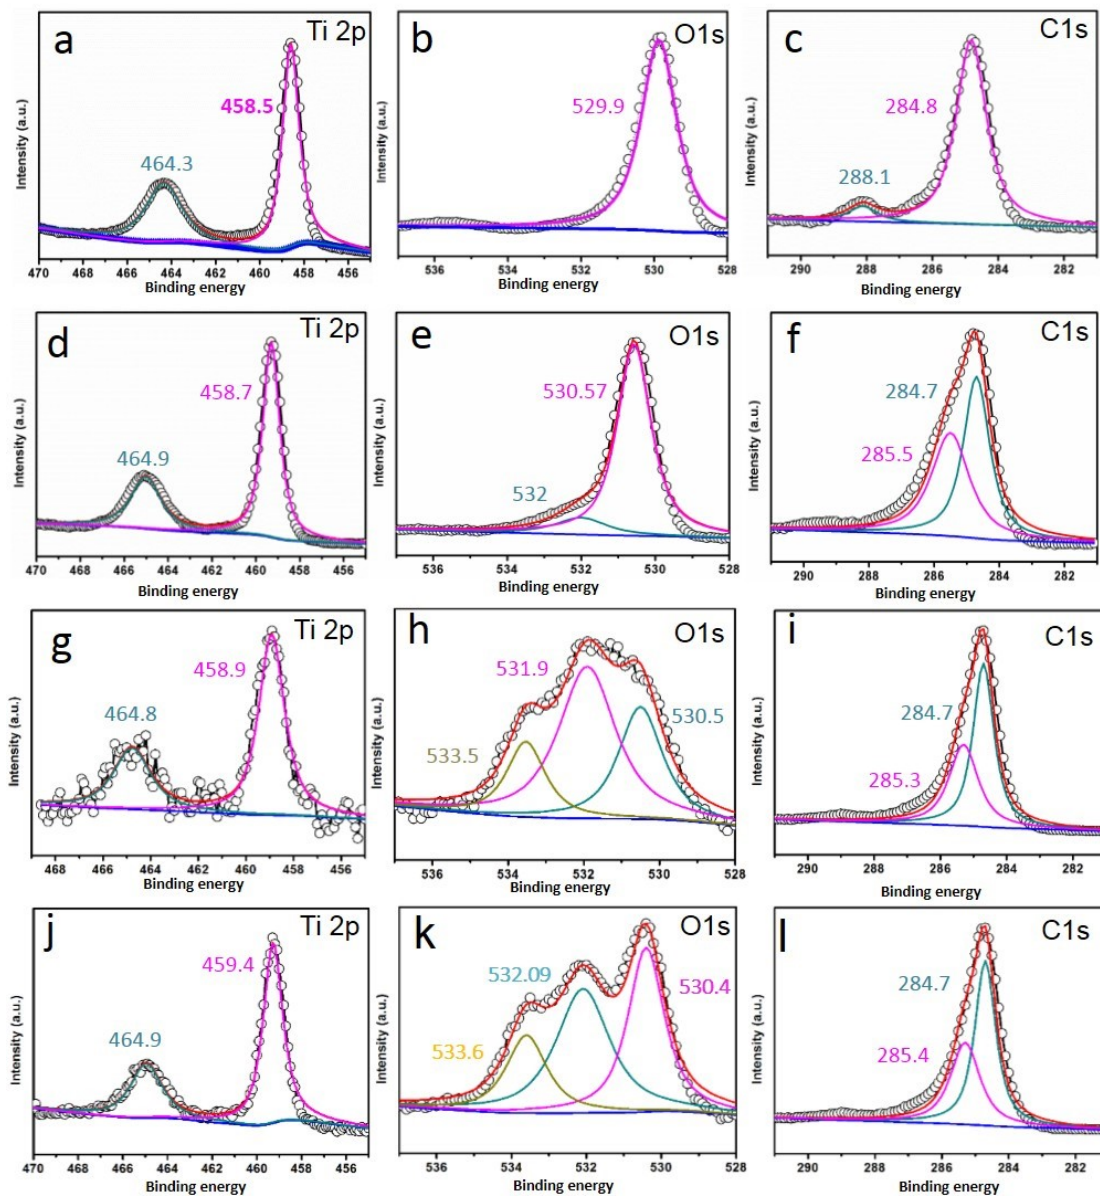

**Figure S8** Ti 2p (a, d, g, j), O 1s (b, e, h, k) and C 1s (c, f, i, l) XPS of the four typical samples of TiO<sub>2</sub> (a-c), TiO<sub>2</sub>-C (d-f), TiO<sub>2</sub>-rGO (g-i), TiO<sub>2</sub>-C-GO (j-l), in which TiO<sub>2</sub> nanocrystals were of the same middle size.

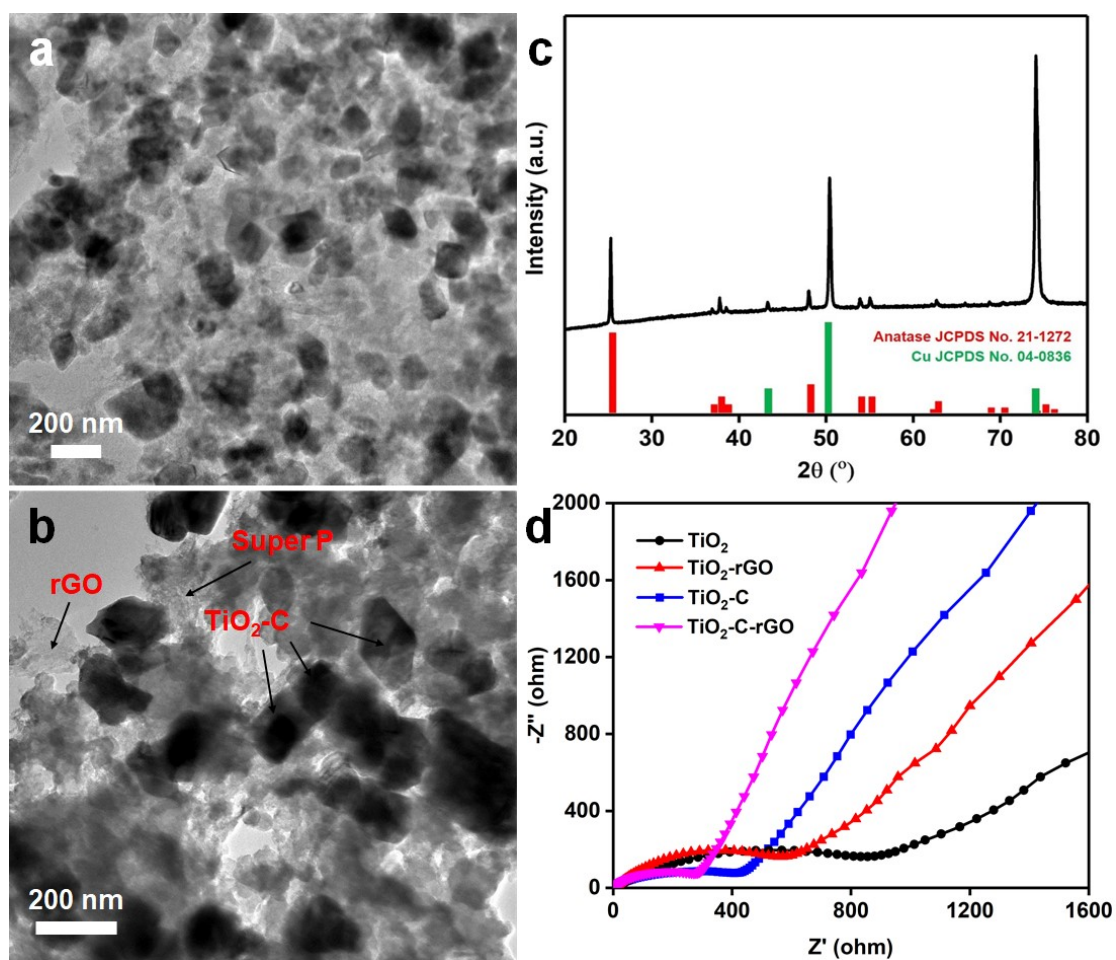

**Figure S9** Characterizations of the active materials corresponding to TiO<sub>2</sub>-C-rGO after cycling for more than 300 cycles at the current rate of 0.1 A g<sup>-1</sup>. (a-b) TEM images (peeled off the copper foils), (c) XRD patterns (loaded on the copper foils), (d) Nyquist plots recorded at the open circuit voltage in the frequency range from 100 kHz to 100 mHz with an amplitude of 5 mV. For comparison, the corresponding Nyquist plots of TiO<sub>2</sub>-C, TiO<sub>2</sub>-rGO, and TiO<sub>2</sub> were also provided.

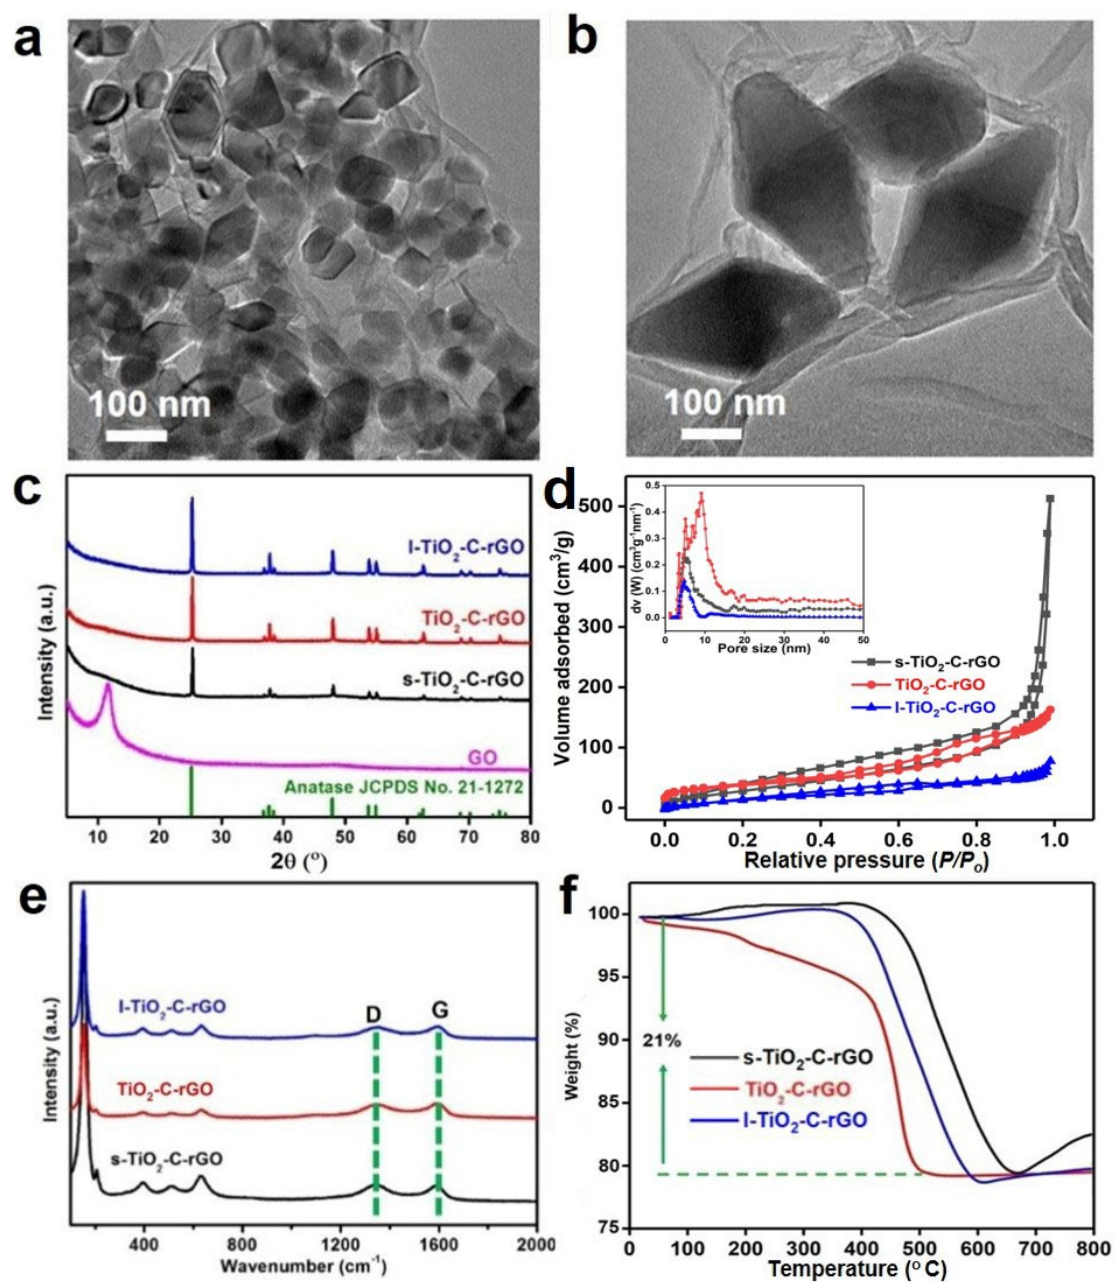

**Figure S10** TEM images (a, s-TiO<sub>2</sub>-C-rGO; b, l-TiO<sub>2</sub>-C-rGO), XRD patterns (c), N<sub>2</sub> adsorption-desorption isotherms (d), Raman spectra (e), and TG curves (f) of s-TiO<sub>2</sub>-C-rGO and l-TiO<sub>2</sub>-C-rGO. For comparison, the latter four characterizations of TiO<sub>2</sub>-C-rGO were also provided.

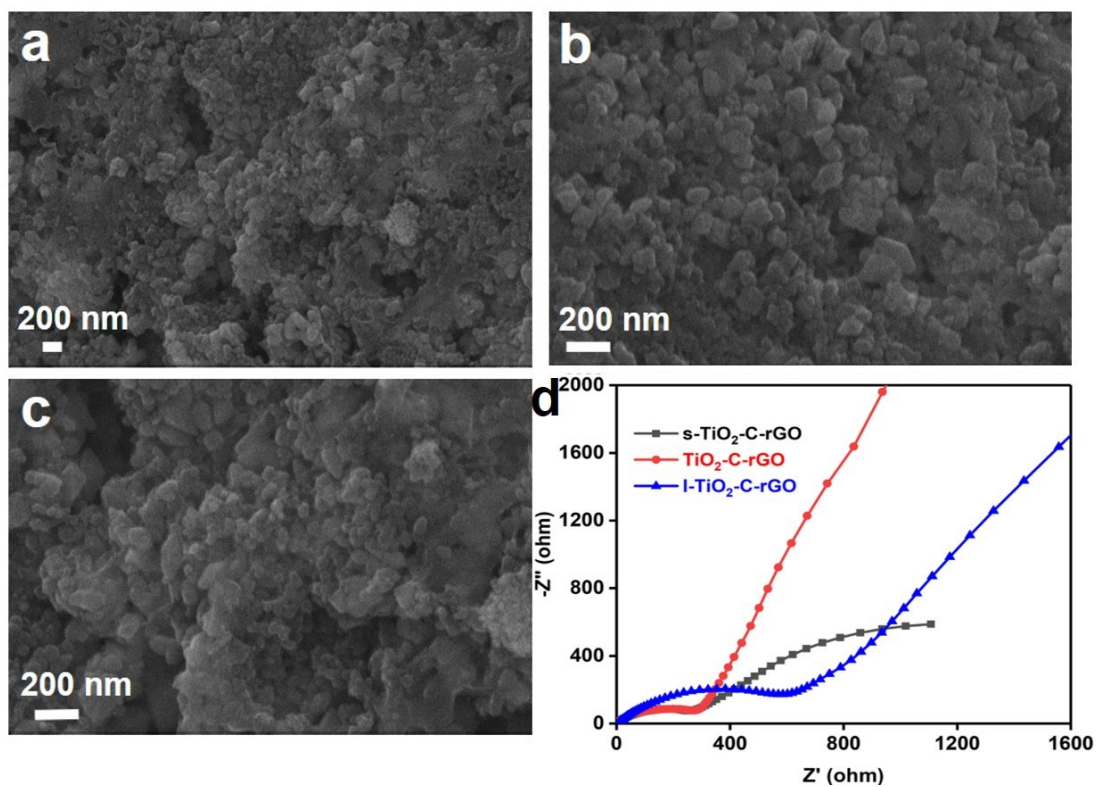

**Figure S11** SEM images (a-c) and Nyquist plots (d) of the three composites of s-TiO<sub>2</sub>-C-rGO (a), TiO<sub>2</sub>-C-rGO (b) and l-TiO<sub>2</sub>-C-rGO (c) after cycling for more than 300 cycles at the current rate of 0.1 A g<sup>-1</sup>. The Nyquist plots were recorded at the open circuit voltage in the frequency range from 100 kHz to 100 mHz with an amplitude of 5 mV

**Table S1** Comparisons of lithium storage performances with reported TiO<sub>2</sub>-based nanostructures.

| Materials                                                                                  | Initial capacity<br>(mA h g <sup>-1</sup> /A g <sup>-1</sup> ) | Rate capacity<br>(mA h g <sup>-1</sup> /A g <sup>-1</sup> )              | Long-term capacity<br>(mA h g <sup>-1</sup> /A g <sup>-1</sup> /cycle) | Ref.      |
|--------------------------------------------------------------------------------------------|----------------------------------------------------------------|--------------------------------------------------------------------------|------------------------------------------------------------------------|-----------|
| TiO <sub>2</sub> -C-rGO                                                                    | 1797.6/0.1                                                     | 714.3/0.5 563.7/1.0 446.2/2.0<br>337.6/5.0 211.4/10.0                    | 398/5.0/600<br>834/0.1/300                                             | This work |
| TiO <sub>2</sub> -C                                                                        | 536.7/0.1                                                      | 253.6/0.5 195.9/1.0 155.9/2.0<br>111.6/5.0 65.1/10.0                     | 146.9/5.0/600<br>290.3/0.1/300                                         | This work |
| TiO <sub>2</sub> -rGO                                                                      | 522.4/0.1                                                      | 189.2/0.5 144.9/1.0 116.1/2.0<br>87.3/5.0 51.9/10.0                      | 57.2/5.0/600<br>240.5/0.1/300                                          | This work |
| TiO <sub>2</sub>                                                                           | 195.9/0.1                                                      | 129.4/0.5 93.9/1.0 78.4/2.0<br>62.9/5.0 43.1/10.0                        | 38.9/5.0/600<br>85.4/0.1/300                                           | This work |
| Hierarchically assembled carbon-coated TiO <sub>2</sub>                                    | -                                                              | 225/0.168 188/0.84<br>162/1.68 91/8.4                                    | -                                                                      | 1         |
| TiO <sub>2-x</sub> C <sub>x</sub> decahedral plate                                         | 150/0.034                                                      | 79/2.52                                                                  | 145/0.168/100                                                          | 2         |
| Porous TiO <sub>2</sub> nanofibers decorated with N-doped carbon                           | 567/0.0335                                                     | 354/0.1675 313/0.335 254/0.8375<br>204/1.675 156/3.35 97/6.7             | 368/0.08375/200<br>176/3.35/2000                                       | 3         |
| Mesoporous TiO <sub>2</sub> @N-doped Carbon                                                | 219/0.084                                                      | 174/0.168 169/0.336 148/0.84<br>127/1.68 118/3.36                        | 117/1.68/2000                                                          | 4         |
| TiO <sub>2</sub> @carbon core-shell nanosheets                                             | 1098/0.23                                                      | 388/0.12 294/0.23 247/0.46<br>198/1.2 172/2.3 147/4.6                    | 549/0.23/300<br>385/4.6/2000                                           | 5         |
| Ultrathin mesoporous TiO <sub>2</sub> /flexible graphitized carbon                         | 260/3.4                                                        | 180/6.8 150/10.2                                                         | 213/3.4/1000                                                           | 6         |
| TiO <sub>2</sub> /nitrogen-doped carbon foams                                              | 259/0.1                                                        | 188/0.2 169/0.5<br>147/1.0 104/2.0                                       | 149/1.0/100                                                            | 7         |
| Mesoporous TiO <sub>2</sub> /carbon                                                        | 909.4/0.1                                                      | 441.0/0.1 413.7/0.2 345.5/0.5<br>289.7/1.0 237.8/2.0 206.8/3.0           | 270.1/1.0/500                                                          | 8         |
| Hierarchical TiO <sub>2</sub> /C                                                           | 283/0.084                                                      | 159/0.168 128/0.336 103/0.84                                             | 188/0.084/200                                                          | 9         |
| TiO <sub>2</sub> hollow spheres with conformal carbon coating                              | 225/0.1                                                        | 177/0.2 164/0.5 151/1.0 131/2.0<br>114/5.0 91/10.0                       | 178/0.1/100<br>137/1.0/1000                                            | 10        |
| Mesoporous TiO <sub>2</sub> microfibers@N-doped carbon                                     | 347.2/0.085                                                    | 200.0/0.17 181.5/0.34 152.6/0.85<br>124.6/1.7 78.0/5.1 60.0/8.5          | 150.0/0.85/100<br>127.2/1.7/100                                        | 11        |
| Hierarchically porous TiO <sub>2</sub> /graphitic carbon microspheres                      | 189/0.084                                                      | 123/0.84                                                                 | 138.5/0.084/50                                                         | 12        |
| TiO <sub>2</sub> (B)@PGNS                                                                  | 864.9/0.1                                                      | 373/0.1 335/0.2 297/0.5<br>274/1.0 232/2.0 199/5.0                       | 573/1.0/600                                                            | 13        |
| TiO <sub>2-x</sub> /GQD                                                                    | 360.5/0.84<br>425.1/0.168                                      | 144.6/2.52                                                               | 160.1/1.68/500                                                         | 14        |
| TiO <sub>2</sub> -rGO hollow spheres                                                       | 265/0.0188                                                     | 216/0.094 188/0.188 166/0.374<br>151/0.94 132/1.88 109/3.74              | 174.4/0.188/200<br>146/0.940/200                                       | 15        |
| TiO <sub>2</sub> -RGO                                                                      | 816/0.06                                                       | 232/1.2                                                                  | 210/1.2/1000                                                           | 16        |
| Mesoporous TiO <sub>2</sub> /graphene/mesoporous TiO <sub>2</sub> sandwich-like nanosheets | 362/0.02                                                       | 238/0.04 225/0.1 210/0.2<br>187/0.5 175/1.0                              | 237/0.02/100                                                           | 17        |
| Graphene@mTiO <sub>2</sub> @carbon nanosheets                                              | 195/0.2                                                        | -                                                                        | 110/0.2/100                                                            | 18        |
| TiO <sub>2</sub> /GAs                                                                      | 605/0.1                                                        | 99/5.0                                                                   | 200/0.1/50                                                             | 19        |
| Anatase TiO <sub>2</sub> quantum-dot/graphene nanosheet                                    | 272/0.168                                                      | 161/0.336 145/1.68 101/8.4                                               | 191/1.68/100                                                           | 20        |
| Ultrafine TiO <sub>2</sub> nanoparticles/N-doped graphene foams                            | 226/0.0168                                                     | 190/0.0336 121/1.68 96/3.36                                              | 165/0.168/200<br>143/0.84/200                                          | 21        |
| Ultrathin anatase TiO <sub>2</sub> nanosheet/rGO                                           | 256.4/0.0335                                                   | 202/0.1675 183/0.335 157/0.8375<br>118/1.675 88.3/3.35                   | 174.2/0.1675/200<br>112.9/1.675/260                                    | 22        |
| TiO <sub>2</sub> nanocrystals/RGO sheets                                                   | 352/0.1                                                        | 94/10.0                                                                  | -                                                                      | 23        |
| Flower-like TiO <sub>2</sub> /graphene                                                     | 280/16.8                                                       | -                                                                        | 180/0.17/70                                                            | 24        |
| Double-shelled anatase/TiO <sub>2</sub> (B) hollow microspheres                            | 356.3/0.335                                                    | 148.0/6.70                                                               | 215.4/0.335/100<br>141.6/3.35/1000<br>125.7/6.70/1000                  | 25        |
| Hollow TiO <sub>2</sub> nanostructures                                                     | 330/0.1                                                        | 196/1.0 136/5.0                                                          | 228/0.1/100<br>224/0.2/100<br>195/0.1/500                              | 26        |
| Mesoporous yolk-shell anatase TiO <sub>2</sub> /TiO <sub>2</sub> (B) microspheres          | 330/0.0336                                                     | 181.8/6.72                                                               | 260.1/0.168/500                                                        | 27        |
| TiO <sub>2</sub> spheres                                                                   | 216.9/0.084                                                    | 189.1/0.168 167/0.336<br>136.4/0.84 101.7/1.68                           | 169/0.168/100                                                          | 28        |
| TiO <sub>2</sub> nanofibers                                                                | 220.7/0.04                                                     | -                                                                        | 155/0.04/100                                                           | 29        |
| Hollow TiO <sub>2</sub> nanostructures                                                     | 280/0.173                                                      | 140.8/1.73                                                               | 199.5/0.173/60<br>127.7/1.73/1000                                      | 30        |
| Mesoporous TiO <sub>2</sub> spheres                                                        | 256.3/0.1675                                                   | 113.4/3.35                                                               | 196.0/0.1675/100<br>110.2/3.35/3000                                    | 31        |
| TiO <sub>2</sub> (B) nanosheet-assembled hierarchical tubes                                | 290/0.335                                                      | 202/0.67 182/1.675<br>160/3.35 130/6.7                                   | 160/1.675/400                                                          | 32        |
| Hollow TiO <sub>2</sub> microboxes                                                         | 205/0.17                                                       | 63/3.4                                                                   | 187/0.17/300                                                           | 33        |
| Mesoporous TiO <sub>2</sub> nanowire bundles                                               | 293/0.0334                                                     | 199/0.0835 175/0.167 162/0.334<br>134/0.835 112/1.67                     | 174/0.167/100<br>96/8.35/50                                            | 34        |
| TiO <sub>2</sub> hollow spheres                                                            | 187.4/0.173                                                    | 145.2/0.173 127.3/0.346<br>120.1/0.865 105.6/1.73<br>81.4/3.46 60.8/6.92 | 147.6/0.173/300                                                        | 35        |
| Multishelled TiO <sub>2</sub> hollow microspheres                                          | 260/0.1675                                                     | 129/1.675                                                                | 237/0.1675/100<br>119/1.675/1200                                       | 36        |

## References

1. J. U. Ha, J. Lee, M. A. Abbas, M. D. Lee, J. Lee and J. H. Bang, *ACS Appl. Mater. Interfaces*, 2019, **11**, 11391-11402.
2. P. Niu, T. Wu, L. Wen, J. Tan, Y. Yang, S. Zheng, Y. Liang, F. Li, J. T. S. Irvine, G. Liu, X. Ma and H.-M. Cheng, *Adv. Mater.*, 2018, **30**, 1705999.
3. M. Luo, X. Yu, W. Zhao, R. Xu, Y. Liu and H. Shen, *ACS Appl. Mater. Interfaces*, 2018, **10**, 35060-35068.
4. H. Zhu, Y. Jing, M. Pal, Y. Liu, Y. Liu, J. Wang, F. Zhang and D. Zhao, *Nanoscale*, 2017, **9**, 1539-1546.
5. Y. Wang, S. Duan, Z. Tian, Y. Shen, M. Xie, X. Guo and X. Guo, *J. Mater. Chem. A*, 2017, **5**, 6047-6051.
6. Y. Liu, A. A. Elzatahry, W. Luo, K. Lan, P. Zhang, J. Fan, Y. Wei, C. Wang, Y. Deng, G. Zheng, F. Zhang, Y. Tang, L. Mai and D. Zhao, *Nano Energy*, 2016, **25**, 80-90.
7. S. Chu, Y. Zhong, R. Cai, Z. Zhang, S. Wei and Z. Shao, *Small*, 2016, **12**, 6724-6734.
8. R. Wu, S. Shen, G. Xia, F. Zhu, C. Lastoskie and J. Zhang, *ACS Appl. Mater. Interfaces*, 2016, **8**, 19968-19978.
9. H.-B. Huang, Y. Yang, L.-H. Chen, Y. Wang, S.-Z. Huang, J.-W. Tao, X.-T. Ma, T. Hasan, Y. Li, Y. Xu and B.-L. Su, *Nanoscale*, 2016, **8**, 10928-10937.
10. H. Liu, W. Li, D. Shen, D. Zhao and G. Wang, *J. Am. Chem. Soc.*, 2015, **137**, 13161-13166.
11. W. Cheng, F. Rechberger, D. Primc and M. Niederberger, *Nanoscale*, 2015, **7**, 13898-13906.
12. C. Zhang, Q. Zhang, S. Kang and X. Li, *J. Mater. Chem. A*, 2014, **2**, 2801-2806.
13. L. Pan, Z.-W. Zhou, Y.-T. Liu and X.-M. Xie, *J. Mater. Chem. A*, 2018, **6**, 7070-7079.
14. W. Zhang, T. Xu, Z. Liu, N.-L. Wu and M. Wei, *Chem. Commun.*, 2018, **54**, 1413-1416.
15. A. Mondal, S. Maiti, K. Singha, S. Mahanty and A. B. Panda, *J. Mater. Chem. A*, 2017, **5**, 23853-23862.
16. Y. Cheng, Z. Chen, H. Wu, M. Zhu and Y. Lu, *Adv. Funct. Mater.*, 2016, **26**, 1338-1346.
17. W. Li, F. Wang, Y. Liu, J. Wang, J. Yang, L. Zhang, A. A. Elzatahry, D. Al-Dahyan, Y. Xia and D. Zhao, *Nano Lett.*, 2015, **15**, 2186-2193.
18. Z. Zhang, L. Zhang, W. Li, A. Yu and P. Wu, *ACS Appl. Mater. Interfaces*, 2015, **7**, 10395-10400.
19. B. Qiu, M. Xing and J. Zhang, *J. Am. Chem. Soc.*, 2014, **136**, 5852-5855.
20. R. Mo, Z. Lei, K. Sun and D. Rooney, *Adv. Mater.*, 2014, **26**, 2084-2088.
21. X. Jiang, X. Yang, Y. Zhu, H. Jiang, Y. Yao, P. Zhao and C. Li, *J. Mater. Chem. A*, 2014, **2**, 11124-11133.
22. Z. Wang, J. Sha, E. Liu, C. He, C. Shi, J. Li and N. Zhao, *J. Mater. Chem. A*, 2014, **2**, 8893-8901.
23. W. Li, F. Wang, S. Feng, J. Wang, Z. Sun, B. Li, Y. Li, J. Yang, A. A. Elzatahry, Y. Xia and D. Zhao, *J. Am. Chem. Soc.*, 2013, **135**, 18300-18303.
24. X. Xin, X. Zhou, J. Wu, X. Yao and Z. Liu, *ACS Nano*, 2012, **6**, 11035-11043.
25. H. Ren, R. Yu, J. Qi, L. Zhang, Q. Jin and D. Wang, *Adv. Mater.*, 2019, **31**, 1805754.
26. D.-H. Lee, B.-H. Lee, A. K. Sinha, J.-H. Park, M.-S. Kim, J. Park, H. Shin, K.-S. Lee, Y.-E. Sung and T. Hyeon, *J. Am. Chem. Soc.*, 2018, **140**, 16676-16684.
27. H. Wei, E. F. Rodriguez, A. F. Hollenkamp, A. I. Bhatt, D. Chen and R. A. Caruso, *Adv. Funct. Mater.*, 2017, **27**, 1703270.
28. Y. Li, S. Wang, Y.-B. He, L. Tang, Y. V. Kaneti, W. Lv, Z. Lin, B. Li, Q.-H. Yang and F. Kang, *J. Mater. Chem. A*, 2017, **5**, 4359-4367.
29. S. Lee, W. Eom, H. Park and T. H. Han, *ACS Appl. Mater. Interfaces*, 2017, **9**, 25332-25338.
30. B. Y. Guan, L. Yu, J. Li and X. W. Lou, *Sci. Adv.*, 2016, **2**, e1501554.
31. H. Ren, J. Sun, R. Yu, M. Yang, L. Gu, P. Liu, H. Zhao, D. Kisailus and D. Wang, *Chem. Sci.*, 2016, **7**, 793-

32. H. Hu, L. Yu, X. Gao, Z. Lin and X. W. Lou, *Energy Environ. Sci.*, 2015, **8**, 1480-1483.
33. X. Gao, G. Li, Y. Xu, Z. Hong, C. Liang and Z. Lin, *Angew. Chem. Int. Ed.*, 2015, **54**, 14331-14335.
34. J. Jin, S.-Z. Huang, J. Liu, Y. Li, L.-H. Chen, Y. Yu, H.-E. Wang, C. P. Grey and B.-L. Su, *Adv. Sci.*, 2015, **2**, 1500070.
35. G. Zhang, H. B. Wu, T. Song, U. Paik and X. W. Lou, *Angew. Chem. Int. Ed.*, 2014, **53**, 12590-12593.
36. H. Ren, R. Yu, J. Wang, Q. Jin, M. Yang, D. Mao, D. Kisailus, H. Zhao and D. Wang, *Nano Lett.*, 2014, **14**, 6679-6684.
